# Supplementary material
Source: PubMed Central journal article supplement (PMC5844344)
Supplement: 963FileS1.pdf [file 963FileS1.pdf]

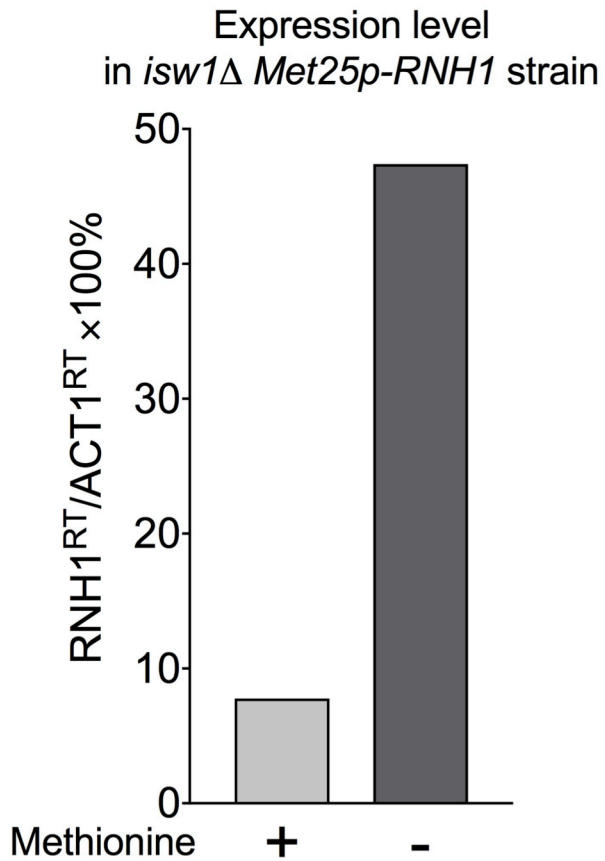

**Figure S1.** Confirmation of increased *RNH1* expression upon induction of the *MET25* promoter. qRT-PCR of *RNH1* transcript levels in *isw1* $\Delta$  strains with *pMET25-RNH1* in non-inducing (+ Methionine) and inducing (- Methionine) conditions. *RNH1* transcript level is normalized to the level of *ACT1* transcript and is presented as percent of *ACT1* transcript level. qRT-PCR confirmation of increased *RNH1* expression is from one experiment.

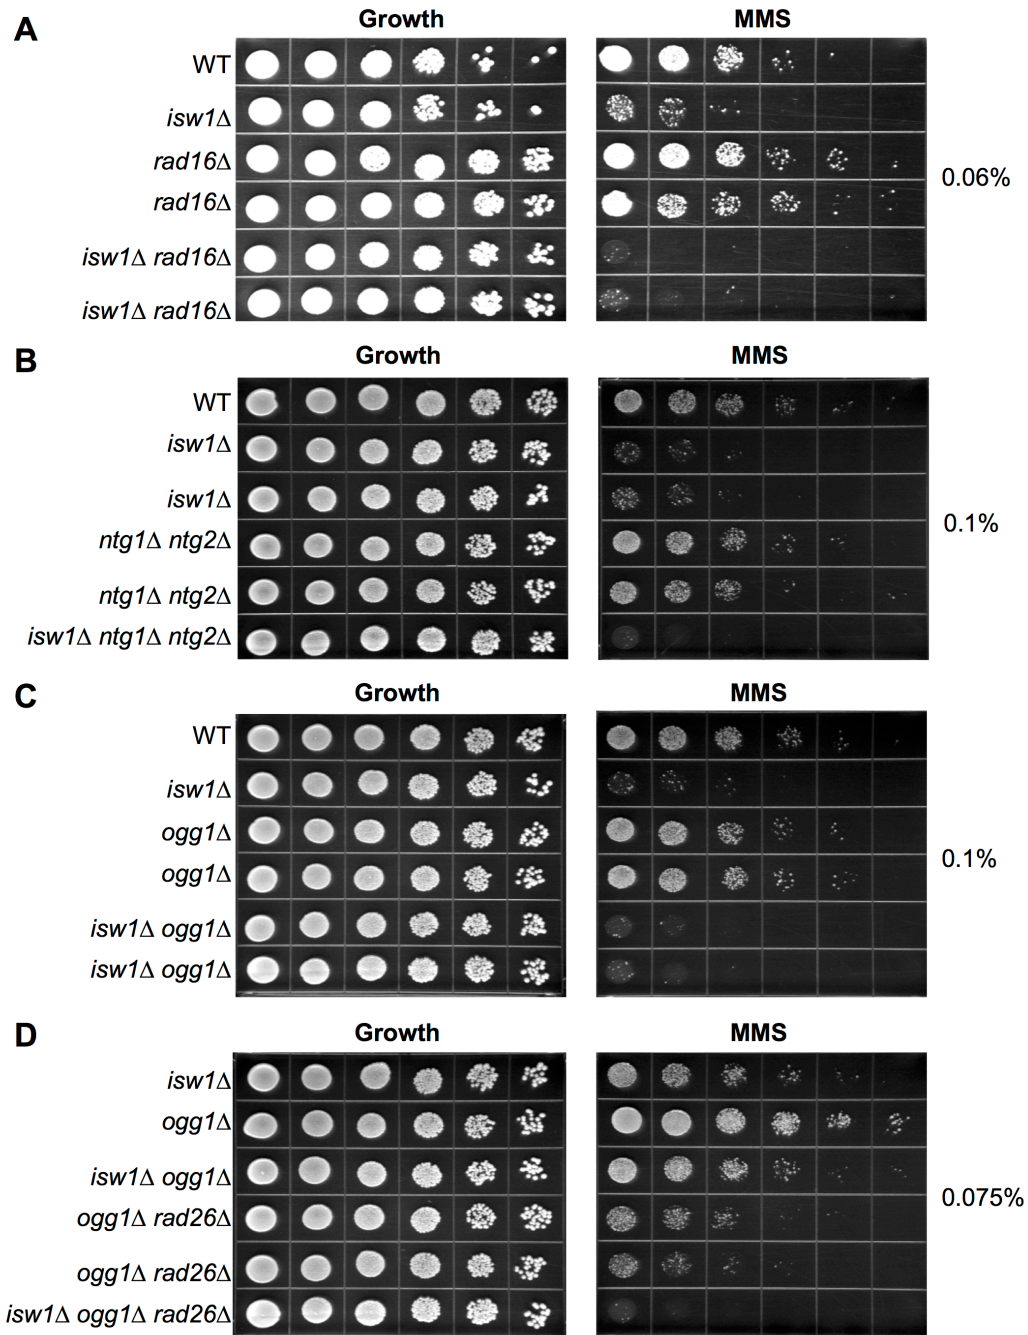

**Figure S2.** NER and BER gene mutations exhibit a synergistic increase in MMS sensitivity when combined with *isw1Δ*. The indicated strains were plated on growth control plates (YC-Leu-Ura) or MMS plates to test MMS sensitivity of WT and *isw1Δ* strains combined with (A) deletion of the NER gene *RAD16* on plates containing 0.06% MMS, (B) deletion of the BER genes *NTG1* and *NTG2* on plates containing 0.1% MMS, (C) deletion of the BER gene *OGG1* on plates containing 0.1% MMS, and (D) combined deletion of the BER gene *OGG1* and the TCR gene *RAD26* on plates containing 0.075% MMS. Plates were incubated at 30°C for 3 days prior to capturing images.

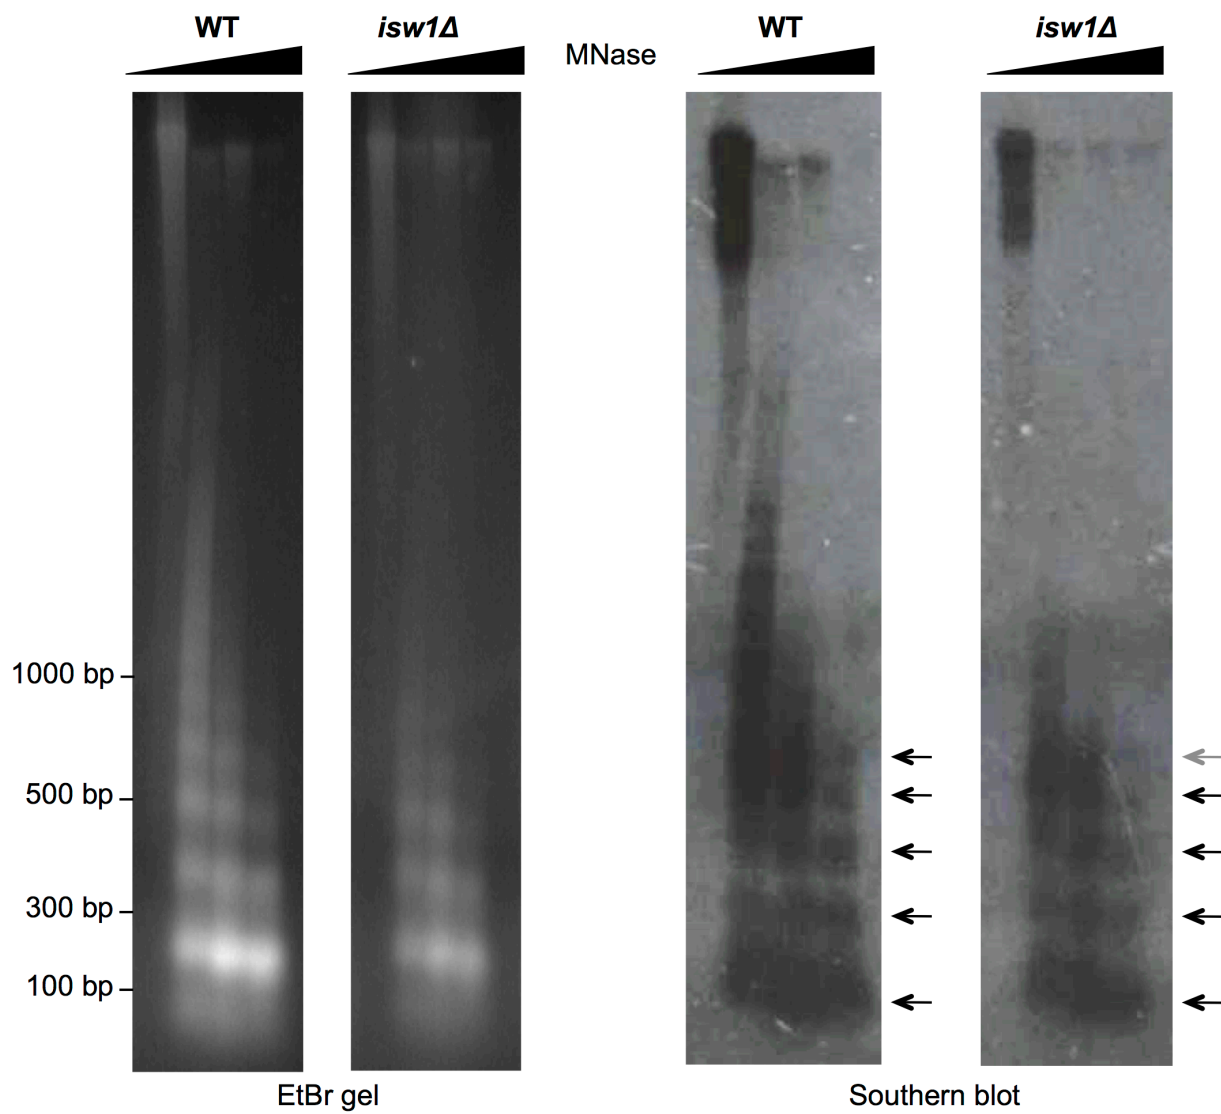

**Figure S3.** Absence of *Isw1* alters the nucleosome array at the CAG-85 repeat on the *URA3*-YAC. MNase assay of WT and *isw1* $\Delta$  strains containing the CAG-85 *URA3*-YAC. The wedge indicates increasing MNase level (0-7.5 U). MNase digested DNA (20-30  $\mu$ g) was run on 1.5% agarose with EtBr (left panels) and Southern blotted using a probe ~100bp upstream of the CAG repeat (right panels).

**Table S1. Yeast strains used in this study<sup>a</sup>**

| Strain        | Genotype                                                                                                                                                                                                              | YAC                     | Reference                  |
|---------------|-----------------------------------------------------------------------------------------------------------------------------------------------------------------------------------------------------------------------|-------------------------|----------------------------|
| VPS105        | <i>MAT<math>\alpha</math> ade2 ade3 can1 leu2-3,112 ura3<math>\Delta</math>0 trp1<math>\Delta</math> lys2-801</i>                                                                                                     | none                    | Schultz and Zakian 1994    |
| BY4705        | <i>MAT<math>\alpha</math> ade2<math>\Delta</math>::hisG his3<math>\Delta</math>200 leu2<math>\Delta</math>0 lys2<math>\Delta</math>0 met15<math>\Delta</math>0 trp1<math>\Delta</math>63 ura3<math>\Delta</math>0</i> | none                    | Brachmann et al. 1998      |
| BY4742        | <i>MAT<math>\alpha</math> his3<math>\Delta</math>1 leu2<math>\Delta</math>0 lys2<math>\Delta</math>0 ura3<math>\Delta</math>0</i>                                                                                     | none                    | Brachmann et al. 1998      |
| CFY809, 810   | BY4705                                                                                                                                                                                                                | CAG-85 <i>LEU2 URA3</i> | Yang and Freudenreich 2007 |
| CFY967, 968   | BY4742, <i>isw1<math>\Delta</math>::kanMX4</i>                                                                                                                                                                        | CAG-85 <i>LEU2 URA3</i> |                            |
| CFY1359, 1360 | BY4742, <i>cbf1<math>\Delta</math>::kanMX6</i>                                                                                                                                                                        | CAG-85 <i>LEU2 URA3</i> |                            |
| CFY1683       | BY4705, <i>isw1<math>\Delta</math>::kanMX4</i>                                                                                                                                                                        | CAG-85 <i>LEU2 URA3</i> |                            |
| CFY2001, 2002 | BY4742, <i>isw1<math>\Delta</math>::kanMX4 rad52<math>\Delta</math>::HIS3MX6</i>                                                                                                                                      | CAG-85 <i>LEU2 URA3</i> |                            |
| CFY2050       | BY4705, <i>esa1-1851-kanMX6</i>                                                                                                                                                                                       | CAG-85 <i>LEU2 URA3</i> | House et al. 2014          |
| CFY2097, 2098 | BY4705, <i>isw2<math>\Delta</math>::kanMX4</i>                                                                                                                                                                        | CAG-85 <i>LEU2 URA3</i> |                            |
| CFY2101, 2102 | BY4705, <i>apn1<math>\Delta</math>::HIS3MX6</i>                                                                                                                                                                       | CAG-85 <i>LEU2 URA3</i> |                            |
| CFY2103, 2104 | BY4742, <i>apn1<math>\Delta</math>::HIS3MX6 isw1<math>\Delta</math>::kanMX4</i>                                                                                                                                       | CAG-85 <i>LEU2 URA3</i> |                            |
| CFY2105, 2106 | BY4705, <i>rad14<math>\Delta</math>::HIS3MX6</i>                                                                                                                                                                      | CAG-85 <i>LEU2 URA3</i> |                            |
| CFY2107, 2108 | BY4742, <i>isw1<math>\Delta</math>::kanMX4 rad14<math>\Delta</math>::HIS3MX6</i>                                                                                                                                      | CAG-85 <i>LEU2 URA3</i> |                            |
| CFY2181, 2182 | BY4705, <i>ioc4<math>\Delta</math>::HIS3MX6</i>                                                                                                                                                                       | CAG-85 <i>LEU2 URA3</i> |                            |
| CFY2190, 2191 | BY4705, <i>ioc3<math>\Delta</math>::TRP1 ioc4<math>\Delta</math>::HIS3MX6</i>                                                                                                                                         | CAG-85 <i>LEU2 URA3</i> |                            |
| CFY2205, 2206 | BY4705, <i>ioc2<math>\Delta</math>::kanMX4</i>                                                                                                                                                                        | CAG-85 <i>LEU2 URA3</i> |                            |
| CFY2207, 2208 | BY4705, <i>ioc3<math>\Delta</math>::TRP1</i>                                                                                                                                                                          | CAG-85 <i>LEU2 URA3</i> |                            |
| CFY2209, 2210 | BY4705, <i>ioc2<math>\Delta</math>::kanMX4 ioc4<math>\Delta</math>::HIS3MX6</i>                                                                                                                                       | CAG-85 <i>LEU2 URA3</i> |                            |

|               |                                                         |                         |
|---------------|---------------------------------------------------------|-------------------------|
| CFY2211, 2212 | BY4705, <i>ioc2Δ::kanMX4 ioc3Δ::TRP1 ioc4Δ::HIS3MX6</i> | CAG-85 <i>LEU2 URA3</i> |
| CFY2213, 2214 | BY4705, <i>rad26Δ::HIS3MX6</i>                          | CAG-85 <i>LEU2 URA3</i> |
| CFY2216       | BY4742, <i>isw1Δ::kanMX4 rad26Δ::HISMX6</i>             | CAG-85 <i>LEU2 URA3</i> |
| CFY2319, 2320 | BY4705, <i>rad16Δ::HIS3MX6</i>                          | CAG-85 <i>LEU2 URA3</i> |
| CFY2321, 2322 | BY4742, <i>isw1Δ::kanMX4 rad16Δ::HIS3MX6</i>            | CAG-85 <i>LEU2 URA3</i> |
| CFY2323, 2324 | BY4705, <i>ogg1Δ::HIS3MX6</i>                           | CAG-85 <i>LEU2 URA3</i> |
| CFY2325, 2326 | BY4742, <i>isw1Δ::kanMX4 ogg1Δ::HIS3MX6</i>             | CAG-85 <i>LEU2 URA3</i> |
| CFY2335, 2336 | BY4705, <i>set1Δ::HIS3MX6</i>                           | CAG-85 <i>LEU2 URA3</i> |
| CFY2339, 2340 | BY4705, <i>sas3Δ::HIS3MX6</i>                           | CAG-85 <i>LEU2 URA3</i> |
| CFY2341, 2342 | BY4742, <i>isw1Δ::kanMX4 sas3Δ::HIS3MX6</i>             | CAG-85 <i>LEU2 URA3</i> |
| CFY2345, 2346 | BY4705, <i>esa1-1851-kanMX6 isw1Δ::HIS3MX6</i>          | CAG-85 <i>LEU2 URA3</i> |
| CFY2423, 2424 | BY4705, <i>apn1Δ::HIS3MX6 rad26Δ::HPH</i>               | CAG-85 <i>LEU2 URA3</i> |
| CFY2425, 2426 | BY4742, <i>apn1Δ::HIS3MX6 isw1Δ::kanMX4 rad26Δ::HPH</i> | CAG-85 <i>LEU2 URA3</i> |
| CFY2427, 2428 | BY4705, <i>ogg1Δ::HIS3MX6 rad26Δ::HPH</i>               | CAG-85 <i>LEU2 URA3</i> |
| CFY2429       | BY4742, <i>isw1Δ::kanMX4 ogg1Δ::HIS3MX6 rad26Δ::HPH</i> | CAG-85 <i>LEU2 URA3</i> |
| CFY2441       | BY4705, <i>rad52Δ::kanMX4</i>                           | CAG-85 <i>LEU2 URA3</i> |
| CFY2447, 2448 | BY4705, <i>ntg1Δ::HIS3MX6</i>                           | CAG-85 <i>LEU2 URA3</i> |
| CFY2449, 2450 | BY4742, <i>isw1Δ::kanMX4 ntg1Δ::HIS3MX6</i>             | CAG-85 <i>LEU2 URA3</i> |
| CFY2451, 2452 | BY4705, <i>ntg2Δ::HPH</i>                               | CAG-85 <i>LEU2 URA3</i> |
| CFY2453, 2454 | BY4742, <i>isw1Δ::kanMX4 ntg2Δ::HPH</i>                 | CAG-85 <i>LEU2 URA3</i> |
| CFY2455, 2456 | BY4705, <i>ntg1Δ::HIS3MX6 ntg2Δ::HPH</i>                | CAG-85 <i>LEU2 URA3</i> |
| CFY2457       | BY4742, <i>isw1Δ::kanMX4 ntg1Δ::HIS3MX6 ntg2Δ::HPH</i>  | CAG-85 <i>LEU2 URA3</i> |

House et al 2014

|               |                                                      |                         |                          |
|---------------|------------------------------------------------------|-------------------------|--------------------------|
| CFY3012       | BY4705                                               | pGAL1 CAG-100 LEU2 URA3 |                          |
| CFY3013       | BY4705, <i>isw1Δ::kanMX4</i>                         | pGAL1 CAG-100 LEU2 URA3 |                          |
| CFY3273, 3274 | VPS105                                               | CAG-85 LEU2 ADE2-URA3   |                          |
| CFY3331, 3332 | VPS105, <i>isw1Δ::kanMX4</i>                         | CAG-85 LEU2 ADE2-URA3   |                          |
| CFY3399, 3411 | BY4742, <i>isw1Δ::kanMX4 MET17 pMET25-RNH1-natMX</i> | CAG-85 LEU2 URA3        |                          |
| CFY3580       | BY4705                                               | CAG-70 LEU2 URA3 2T     | Su and Freudenreich 2017 |
| CFY3694, 3695 | BY4705, <i>set2Δ::HIS3MX6</i>                        | CAG-85 LEU2 URA3        |                          |
| CFY3817, 3818 | BY4705, <i>isw1Δ::kanMX4</i>                         | CAG-70 LEU2 URA3 2T     |                          |
| CFY4035, 4036 | BY4705, <i>chd1Δ::HPH</i>                            | CAG-85 LEU2 URA3        |                          |
| CFY4037, 4038 | BY4742, <i>chd1Δ::HPH isw1Δ::kanMX4</i>              | CAG-85 LEU2 URA3        |                          |

---

<sup>a</sup>Unless otherwise noted, strains were constructed during the course of this study or are part of the standard lab collection.

**Table S2. CAG repeat stability assay data**

| WT, CAG-85 URA3-YAC                               | Total Rxns | Contractions |      |         |                              | Expansions |      |         |                             |                                      |
|---------------------------------------------------|------------|--------------|------|---------|------------------------------|------------|------|---------|-----------------------------|--------------------------------------|
|                                                   |            | #            | %    | Fold/WT | p-value <sup>b</sup> to WT   | #          | %    | Fold/WT | p-value <sup>b</sup> to WT  | p-value <sup>b</sup> to <i>isw1Δ</i> |
| Wild-type                                         | 299        | 33           | 11.0 | --      | --                           | 4          | 1.3  | --      | --                          | --                                   |
| <b>Chromatin remodeling</b>                       |            |              |      |         |                              |            |      |         |                             |                                      |
| <i>isw1Δ</i>                                      | 307        | 42           | 13.7 | 1.2     | 0.33                         | 25         | 8.1  | 6.1     | <b>7.0 x10<sup>-5</sup></b> | --                                   |
| <i>isw2Δ</i>                                      | 158        | 24           | 15.2 | 1.4     | 0.23                         | 3          | 1.9  | 1.4     | 0.07                        | --                                   |
| <i>chd1Δ</i>                                      | 104        | 11           | 10.6 | 0.96    | 1                            | 7          | 6.7  | 5.0     | <b>8.0 x10<sup>-3</sup></b> | --                                   |
| <i>isw1Δ chd1Δ</i>                                | 104        | 14           | 13.5 | 1.2     | 0.48                         | 5          | 4.8  | 3.6     | <b>0.053</b>                | 0.38                                 |
| <b>Isw1 complexes</b>                             |            |              |      |         |                              |            |      |         |                             |                                      |
| <i>ioc3Δ</i>                                      | 156        | 15           | 9.6  | 0.87    | 0.75                         | 6          | 3.9  | 2.9     | 0.099                       | --                                   |
| <i>ioc2Δ</i>                                      | 156        | 23           | 14.7 | 1.3     | 0.29                         | 6          | 3.9  | 2.9     | 0.099                       | --                                   |
| <i>ioc4Δ</i>                                      | 156        | 19           | 12.2 | 1.1     | 0.76                         | 8          | 5.1  | 3.8     | <b>0.027</b>                | --                                   |
| <i>ioc2Δ ioc4Δ</i>                                | 156        | 18           | 11.5 | 1.1     | 0.88                         | 8          | 5.1  | 3.8     | <b>0.027</b>                | --                                   |
| <i>ioc3Δ ioc4Δ</i>                                | 156        | 16           | 10.3 | 0.93    | 0.87                         | 7          | 4.5  | 3.4     | <b>0.052</b>                | --                                   |
| <i>ioc2Δ ioc3Δ ioc4Δ</i>                          | 156        | 13           | 8.3  | 0.76    | 0.42                         | 5          | 3.2  | 2.4     | 0.29                        | --                                   |
| <b>CBF1 and histone methyltransferases (HMTs)</b> |            |              |      |         |                              |            |      |         |                             |                                      |
| <i>set1Δ</i>                                      | 149        | 19           | 12.8 | 1.2     | 0.16                         | 1          | 0.67 | 0.50    | 1                           | --                                   |
| <i>set2Δ</i>                                      | 180        | 30           | 16.7 | 1.5     | 0.094                        | 5          | 2.8  | 2.1     | 0.31                        | --                                   |
| <i>cbf1Δ</i>                                      | 104        | 5            | 4.8  | 0.44    | 0.08                         | 4          | 3.8  | 2.9     | 0.2                         | --                                   |
| <b>Histone acetyltransferases (HATs)</b>          |            |              |      |         |                              |            |      |         |                             |                                      |
| <i>sas3Δ</i>                                      | 154        | 23           | 14.9 | 1.4     | 0.23                         | 4          | 2.6  | 1.9     | 0.45                        | --                                   |
| <i>esa1-1851</i>                                  | 125        | 25           | 20.0 | 1.8     | <b>0.054</b>                 | 10         | 8.0  | 6.0     | <b>5.0 x10<sup>-3</sup></b> | --                                   |
| <i>isw1Δ sas3Δ</i>                                | 156        | 19           | 12.2 | 1.1     | 0.76                         | 12         | 7.7  | 5.8     | <b>8.7 x10<sup>-4</sup></b> | 1                                    |
| <i>isw1Δ esa1-1851</i>                            | 104        | 28           | 26.9 | 2.4     | <b>2.2 x 10<sup>-4</sup></b> | 13         | 12.5 | 9.3     | <b>1.1 x10<sup>-5</sup></b> | 0.24                                 |
| <b>CAG-85 ADE2-URA3-YAC</b>                       |            |              |      |         |                              |            |      |         |                             |                                      |
| WT                                                | 148        | 27           | 18.2 | --      | --                           | 3          | 2.0  | --      | --                          | --                                   |
| <i>isw1Δ</i>                                      | 200        | 34           | 17.0 | 0.93    | 0.78                         | 3          | 1.5  | 0.74    | 0.70                        | --                                   |

**TT CAG-70 TT URA3-YAC (2T-YAC)**

---

|              |     |    |     |      |    |   |      |     |      |    |
|--------------|-----|----|-----|------|----|---|------|-----|------|----|
| WT           | 326 | 17 | 5.2 | --   | -- | 3 | 0.92 | --  | --   | -- |
| <i>isw1Δ</i> | 88  | 4  | 4.6 | 0.87 | 1  | 2 | 2.3  | 2.5 | 0.29 | -- |

**pGAL1 CAG-100 URA3-YAC**

---

|                          |     |    |     |      |      |   |     |     |      |    |
|--------------------------|-----|----|-----|------|------|---|-----|-----|------|----|
| WT, glucose              | 200 | 16 | 8.0 | --   | --   | 2 | 1.0 | --  | --   | -- |
| <i>isw1Δ</i> , glucose   | 199 | 14 | 7.0 | 0.88 | 0.85 | 4 | 2.0 | 2.0 | 0.45 | -- |
| WT, galactose            | 200 | 8  | 4.0 | --   | --   | 4 | 2.0 | --  | --   | -- |
| <i>isw1Δ</i> , galactose | 200 | 14 | 7.0 | 1.8  | 0.27 | 9 | 4.5 | 2.3 | 0.26 | -- |

**RNase H overexpression**

---

|                                    |     |    |     |      |      |   |     |     |                             |    |
|------------------------------------|-----|----|-----|------|------|---|-----|-----|-----------------------------|----|
| <i>isw1Δ</i> , RNase H not induced | 103 | 8  | 7.8 | 0.71 | 0.45 | 7 | 6.8 | 5.2 | <b>7.9 x10<sup>-3</sup></b> | -- |
| <i>isw1Δ</i> , RNase H induced     | 104 | 10 | 9.6 | 0.87 | 0.85 | 8 | 7.7 | 5.9 | <b>3.0 x10<sup>-3</sup></b> | -- |

**HR pathway**

---

|                     |     |    |      |      |                              |    |     |     |                             |    |
|---------------------|-----|----|------|------|------------------------------|----|-----|-----|-----------------------------|----|
| <i>rad52Δ</i>       | 199 | 45 | 22.6 | 2.1  | <b>6.4 x 10<sup>-4</sup></b> | 4  | 2.0 | 1.5 | 1                           | -- |
| <i>isw1Δ rad52Δ</i> | 256 | 24 | 9.4  | 0.85 | 0.58                         | 20 | 7.8 | 5.8 | <b>2.1 x10<sup>-4</sup></b> | 1  |

**NER pathway**

---

|                     |     |    |      |      |      |    |     |     |                             |                             |
|---------------------|-----|----|------|------|------|----|-----|-----|-----------------------------|-----------------------------|
| <i>rad14Δ</i>       | 204 | 25 | 12.3 | 1.1  | 0.67 | 11 | 5.4 | 4.0 | <b>0.014</b>                | --                          |
| <i>rad26Δ</i>       | 143 | 20 | 14.0 | 1.3  | 0.43 | 2  | 1.4 | 1.1 | 1                           | --                          |
| <i>rad16Δ</i>       | 156 | 23 | 14.7 | 1.3  | 0.29 | 9  | 5.8 | 4.3 | <b>0.014</b>                | --                          |
| <i>isw1Δ rad14Δ</i> | 208 | 15 | 7.2  | 0.65 | 0.17 | 5  | 2.4 | 1.8 | 0.50                        | <b>6.6 x10<sup>-3</sup></b> |
| <i>isw1Δ rad26Δ</i> | 123 | 12 | 9.8  | 0.88 | 0.86 | 4  | 3.3 | 2.4 | 0.24                        | 0.087                       |
| <i>isw1Δ rad16Δ</i> | 156 | 22 | 14.1 | 1.3  | 0.37 | 11 | 7.1 | 5.3 | <b>3.6 x10<sup>-3</sup></b> | 0.86                        |

**BER pathway**

---

|                    |     |    |      |      |      |   |      |      |      |    |
|--------------------|-----|----|------|------|------|---|------|------|------|----|
| <i>apn1Δ</i>       | 208 | 16 | 7.7  | 0.70 | 0.23 | 1 | 0.48 | 0.36 | 0.65 | -- |
| <i>ogg1Δ</i>       | 156 | 23 | 14.7 | 1.3  | 0.29 | 4 | 2.6  | 1.9  | 0.46 | -- |
| <i>ntg1Δ</i>       | 208 | 22 | 10.6 | 0.96 | 1    | 4 | 1.9  | 1.4  | 0.72 | -- |
| <i>ntg2Δ</i>       | 208 | 20 | 9.6  | 0.87 | 0.66 | 6 | 2.9  | 2.2  | 0.33 | -- |
| <i>ntg1Δ ntg2Δ</i> | 207 | 26 | 12.7 | 1.1  | 0.67 | 2 | 0.97 | 0.72 | 1    | -- |



|                            |     |    |      |      |              |    |     |     |              |                             |
|----------------------------|-----|----|------|------|--------------|----|-----|-----|--------------|-----------------------------|
| <i>isw1Δ apn1Δ</i>         | 208 | 15 | 7.2  | 0.65 | 0.17         | 3  | 1.4 | 1.1 | 1            | <b>6.1 x10<sup>-4</sup></b> |
| <i>isw1Δ ogg1Δ</i>         | 156 | 13 | 8.3  | 0.76 | 0.42         | 3  | 1.9 | 1.4 | 0.70         | <b>6.8 x10<sup>-3</sup></b> |
| <i>isw1Δ ntg1Δ</i>         | 208 | 23 | 11.1 | 1.0  | 1            | 4  | 1.9 | 1.4 | 0.72         | <b>2.8 x10<sup>-3</sup></b> |
| <i>isw1Δ ntg2Δ</i>         | 208 | 23 | 11.1 | 1.0  | 1            | 8  | 3.9 | 2.9 | 0.08         | 0.066                       |
| <i>isw1Δ ntg1Δ ntg2Δ</i>   | 208 | 23 | 11.1 | 1.0  | 1            | 10 | 4.8 | 3.6 | <b>0.026</b> | 0.16                        |
| <b>NER and BER pathway</b> |     |    |      |      |              |    |     |     |              |                             |
| <i>apn1Δ rad26Δ</i>        | 102 | 17 | 16.7 | 1.5  | 0.16         | 2  | 2.0 | 1.5 | 0.65         | --                          |
| <i>isw1Δ apn1Δ rad26Δ</i>  | 96  | 18 | 18.8 | 1.7  | <b>0.057</b> | 2  | 2.1 | 1.6 | 0.64         | <b>0.037</b>                |

<sup>b</sup>p-values in bold font show significant differences of  $p \leq 0.05$ .

## Supporting Information References

- Brachmann, C. B., A. Davies, G. J. Cost, E. Caputo, J. Li, P. Hieter, and J. D. Boeke, 1998 Designer deletion strains derived from *Saccharomyces cerevisiae* S288C: a useful set of strains and plasmids for PCR-mediated gene disruption and other applications. *Yeast* **14**: 115-132.
- House, N. C. M., J. H. Yang, S. C. Walsh, J. M. Moy, and C. H. Freudenreich, 2014 NuA4 initiates dynamic histone H4 acetylation to promote high-fidelity sister chromatid recombination at postreplication gaps. *Mol. Cell* **55**: 818-828.
- Schulz, V. P., and V. A. Zakian, 1994 The *Saccharomyces PIF1* DNA helicase inhibits telomere elongation and de novo telomere formation. *Cell* **76**: 145-155.
- Su, X. A., and C. H. Freudenreich, 2017 Cytosine deamination and base excision repair cause R-loop-induced CAG repeat fragility and instability in *Saccharomyces cerevisiae*. *Proc. Natl. Acad. Sci. USA* **114**: E8392-E8401.
- Yang, J., and C. H. Freudenreich, 2007 Haploinsufficiency of yeast *FEN1* causes instability of expanded CAG/CTG tracts in a length-dependent manner. *Gene* **393**:110-115.
